# Supplementary material for: Targeting allosteric site of AKT by 5,7-dimethoxy-1,4-phenanthrenequinone suppresses neutrophilic inflammation
Source: PubMed Central journal article supplement — eBioMedicine. 2019 Jan 30;40:528–40. doi: 10.1016/j.ebiom.2019.01.043 (PMC6413683; doi:10.1016/j.ebiom.2019.01.043), 2019-01-30

**Targeting allosteric site of AKT by 5,7-dimethoxy-1,4-phenanthrenequinone  
suppresses neutrophilic inflammation**

Po-Jen Chen<sup>a,b,c</sup>, I-Ling Ko<sup>b</sup>, Chia-Lin Lee<sup>d,e</sup>, Hao-Chun Hu<sup>f</sup>, Fang-Rong Chang<sup>f</sup>,  
Yang-Chang Wu<sup>f</sup>, Yann-Lii Leu<sup>b,c,g</sup>, Chih-Ching Wu<sup>h,i</sup>, Cheng-Yu Lin<sup>b</sup>, Chang-Yu  
Pan<sup>b</sup>, Yung-Fong Tsai<sup>b,j</sup>, and Tsong-Long Hwang<sup>b,c,j,k,l,\*</sup>

<sup>a</sup>Department of Cosmetic Science, Providence University, Taichung 433, Taiwan

<sup>b</sup>Graduate Institute of Natural Products, College of Medicine, Chang Gung University,  
Taoyuan 333, Taiwan

<sup>c</sup>Chinese Herbal Medicine Research Team, Healthy Aging Research Center, Chang  
Gung University, Taoyuan 333, Taiwan

<sup>d</sup>Chinese Medicine Research and Development Center, China Medical University  
Hospital, Taichung 404, Taiwan

<sup>e</sup>Department of Cosmeceutics, China Medical University, Taichung 404, Taiwan

<sup>f</sup>Graduate Institute of Natural Products, College of Pharmacy and Research Center for  
Natural Products & Drug Development, Kaohsiung Medical University, Kaohsiung  
807, Taiwan

<sup>g</sup>Center for Traditional Chinese Medicine, Chang Gung Memorial Hospital, Taoyuan  
333, Taiwan

<sup>h</sup>Department of Medical Biotechnology and Laboratory Science, College of Medicine,  
Chang Gung University, Taoyuan 333, Taiwan

<sup>i</sup>Department of Otolaryngology - Head & Neck Surgery, Chang Gung Memorial  
Hospital, Taoyuan 333, Taiwan

<sup>j</sup>Department of Anaesthesiology, Chang Gung Memorial Hospital, Taoyuan 333,  
Taiwan

<sup>k</sup>Research Center for Chinese Herbal Medicine, Research Center for Food and  
Cosmetic Safety, Graduate Institute of Health Industry Technology, College of Human  
Ecology, Chang Gung University of Science and Technology, Taoyuan 333, Taiwan

<sup>l</sup>Department of Chemical Engineering, Ming Chi University of Technology, New  
Taipei City 243, Taiwan

**\*Correspondence to:**

Dr. Tsong-Long Hwang, Graduate Institute of Natural Products, Chang Gung  
University, 259 Wen-Hwa 1<sup>st</sup> Road, Kweishan, Taoyuan 333, Taiwan

Tel: +886 3 2118800 ext. 5523; Fax: +886 3 2118506; E-mail: [htl@mail.cgu.edu.tw](mailto:htl@mail.cgu.edu.tw)

## **Supplementary Materials and Methods**

### **Superoxide anion-scavenging assay**

The superoxide anion-scavenging effect of CLLV-1 was examined in a cell-free xanthine/xanthine oxidase system. The assay buffer contained 50 mM Tris (pH 7.4), 0.3 mM WST-1, and 0.02 U/mL xanthine oxidase. WST-1 was reduced by the superoxide anion after adding 0.1 mM xanthine to the assay buffer at 30 °C. The absorbance was measured at 450 nm.

### **NADPH oxidase activity**

Neutrophils were mixed with 1 mM phenylmethylsulphonyl fluoride for 30 min at 4 °C and sonicated in relaxation buffer (10 mM piperazine-N,N'-bis(2-ethanesulfonic acid) PIPES, 100 mM KCl, 3 mM NaCl, 3.5 mM MgCl<sub>2</sub>, 1 mM ethylene glycol-bis(β-aminoethyl ether)-N,N,N',N'-tetraacetic acid (EGTA), and 1 mM ATP; pH 7.3) to produce cytosolic and plasma membrane fractions. NADPH oxidase was activated by the addition of 100 μM SDS before incubation with DMSO or CLLV-1 for 2 min as described.

### **Elastase activity**

Human neutrophils ( $6 \times 10^5$  cells/mL) were activated by the addition of fMLF

(0.1  $\mu\text{M}$ ) in the presence of CB (2.5  $\mu\text{g}/\text{mL}$ ) for 15 min at 37 °C. Elastase was obtained from the supernatant of the cells after they were centrifuged at 1000 g for 5 min at 4 °C. Then, the supernatant was equilibrated at 37 °C for 2 min and incubated with or without CLLV-1 for 5 min. After incubation, elastase substrate (100  $\mu\text{M}$ ) was added to the reaction solutions. The changes in absorbance were continuously monitored for 10 min at 405 nm to determine the elastase activity.

### **LDH release**

The CytoTox 96 non-radioactive cytotoxicity assay (Promega, Maddison, WI, USA) was used to determine the LDH level. Human neutrophils were treated with CLLV-1 (1 or 3  $\mu\text{M}$ ) for 15 or 60 min. The supernatant was obtained for the LDH assay. LDH release was expressed as a percentage of the amount of enzyme liberated following incubation of human neutrophils with 0.1% Triton X-100 for 30 min at 37 °C.

### **Receptor-binding assay**

Receptor binding was assayed by FACScan analysis of the binding of fNLFNYK, a fluorescent analog of fMLF. Cells were incubated with CLLV-1 for 5 min at 4 °C and labeled with fNLFNYK. After 30 min, the cells were pelleted, resuspended in

ice-cold HBSS, and immediately analyzed using a flow cytometer (FACSCalibur™; BD Bioscience).

### **cAMP concentration**

The concentration of cAMP was determined with an enzyme immunoassay kit (GE Healthcare, Little Chalfont, UK). Neutrophils were treated with DMSO or CLLV-1 at 37 °C for 5 min and then activated by 0.1 μM fMLF for another 1 min. The reaction was terminated by adding 0.5% dodecyltrimethylammonium bromide. After samples were centrifuged at 3000 g for 5 min at 4 °C, the supernatants were analyzed for cAMP according to the manufacturer's instructions.

### Supplementary figure legends

**Fig. S1.** CLLV-1 has no effect on cell viability, superoxide anion scavenging, NADPH oxidase activity, elastase activity, and FPR1 binding. (a) Neutrophils were incubated with DMSO or CLLV-1 (1 or 3  $\mu\text{M}$ ) for 15 and 60 min. Cytotoxicity was evaluated by LDH release as a percentage of total LDH release. (b) The superoxide anion scavenging effect of CLLV-1 (0.1–3  $\mu\text{M}$ ) was assayed in a cell-free xanthine/xanthine oxidase system. Reduction of WST-1 was measured spectrophotometrically at 450 nm. SOD (0.5 or 20 U/mL) was used as the positive control. (c) The subcellular NADPH oxidase activity was investigated in an SDS-reconstituted system. A reaction mixture of neutrophil cytosolic fraction and membrane fraction at 30 °C was activated by the addition of 100  $\mu\text{M}$  SDS before incubation with DMSO, CLLV-1 (0.3 or 3  $\mu\text{M}$ ), or DPI (10  $\mu\text{M}$ ) for 2 min. The reaction was initiated by adding 0.16 mM NADPH, and the changes in absorbance at 550 nm caused by the addition of 0.16 mM NADPH were measured. (d) Human neutrophils were pretreated with fMLF/CB for 15 min. The supernatant was obtained and incubated with DMSO or CLLV-1 (0.1–3  $\mu\text{M}$ ) before the addition of substrate (100  $\mu\text{M}$ ). Elastase activity was measured spectrophotometrically at 405 nm. (e) Neutrophils were preincubated with DMSO, CLLV-1 (0.1–3  $\mu\text{M}$ ), or fMLF (10  $\mu\text{M}$ ) for 5 min before labeling with the fluorescence-labeled peptide fNLFNYK (4 nM) for another 30 min. The fluorescence

was determined by flow cytometry. All data are expressed as mean values  $\pm$  SEM (n = 3); \*\*\* $p$  < 0.001 compared with the control (Student's  $t$ -test).

**Fig. S2.** The representative histograms show an inhibitory effect of CLLV-1 on human neutrophils adhering to ECs. Hoechst 33342-labeled neutrophils were incubated with DMSO or CLLV-1 (0.1–3  $\mu$ M) for 5 min before activation with fMLF (0.1  $\mu$ M)/CB (1  $\mu$ g/mL). Activated neutrophils were then co-cultured with LPS-pre-activated ECs for 30 min. Neutrophils adhering to ECs were detected using microscopy.

**Fig. S3.** CLLV-1 represses superoxide anion generation or elastase release in NaF-, WKYMVm-, IL-8-, or LTB<sub>4</sub>-activated human neutrophils. Human neutrophils were preincubated with DMSO or CLLV-1 (0.03–3  $\mu$ M) and then activated with or without (a,c) NaF (20 mM)/CB (2  $\mu$ g/mL), (b,d) WKYMVm (1 nM)/CB (1  $\mu$ g/mL), (e) IL-8 (50 ng/mL)/CB (2  $\mu$ g/mL), or (f) LTB<sub>4</sub> (0.1  $\mu$ M)/CB (0.5  $\mu$ g/mL). Superoxide anion generation (a-b) and elastase release (c-f) were assayed using cytochrome  $c$  reduction and elastase substrate by spectrophotometry at 550 nm and 405 nm, respectively. All data are expressed as mean values  $\pm$  SEM (n = 3); \*\* $p$  < 0.01 and \*\*\* $p$  < 0.001 compared with the DMSO + fMLF group (Student's  $t$ -test).

**Fig. S4.** CLLV-1 inhibits the phosphorylation of AKT in NaF-, WKYMVm-, IL-8-, or LTB<sub>4</sub>-activated human neutrophils. Human neutrophils were preincubated with DMSO or CLLV-1 (0.03–3 μM) and then activated with or without (a) NaF (20 mM)/CB (2 μg/mL), (b) WKYMVm (1 nM)/CB (1 μg/mL), (c) IL-8 (50 ng/mL)/CB (2 μg/mL), or (d) LTB<sub>4</sub> (0.1 μM)/CB (0.5 μg/mL). Phosphorylation of AKT was analyzed by immunoblotting, using antibodies against phosphorylated (S473 and T308) and total AKT. All data are expressed as mean values ± SEM (n = 3); \**p* < 0.05, \*\**p* < 0.01, and \*\*\**p* < 0.001 compared with the DMSO + fMLF group (Student's *t*-test).

**Fig. S5.** MK-2206 suppresses superoxide anion generation and elastase release in fMLF-activated human neutrophils and AKT activity *in vitro*. Human neutrophils were preincubated with DMSO or MK-2206 (0.3-10 μM) and then activated with or without fMLF (0.1 μM)/CB (1 μg/mL). (a) Superoxide anion generation was detected using cytochrome *c* reduction by spectrophotometry at 550 nm. (b) Elastase release was measured at 405 nm. (c) The active AKT proteins were immunoprecipitated with phospho-AKT antibodies and treated with DMSO, CLLV-1 (1 or 3 μM), or MK-2206 (0.3–3 μM) for 15 min at 30 °C, followed by treatment with GSK-3 fusion protein (AKT substrate) for another 30 min. The phospho-GSK-3 fusion protein was



examined by immunoblotting. All data are expressed as mean values  $\pm$  SEM ( $n = 3$ );  $*p < 0.05$ ,  $**p < 0.01$ , and  $***p < 0.001$  compared with the DMSO + fMLF group (A or B) or GSK protein + AKT group (C) (Student's *t*-test).

**Fig. S6.** The cellular morphology of differentiated HL-60 (dHL-60) cells. The cellular morphologies of HL-60 cells or DMSO-differentiated dHL-60 cells were observed by microscopy for 5 days (D5).

**Fig. S7.** The representative histograms of flow cytometric analysis show an inhibitory effect of CLLV-1 on ROS formation and F-actin assembly, but not on PIP3 expression in fMLF-activated dHL-60 cells. (a) DHR123 was used to detect the intracellular ROS. (b) Alexa Fluor 594 Phalloidin was used to examine the F-actin assembly. (c) Anti-PIP3 antibodies and FITC-labeled anti-mouse IgG antibodies were used to measure PIP3 expression.

**Fig. S8.** CLLV-1 does not affect the AKT upstream kinases in fMLF-activated human neutrophils. Phosphorylation of AKT upstream kinases, PDK1, mTORC2, and PI3K was determined by immunoblotting using antibodies against the phosphorylated form and normalized to GAPDH.

**Fig. S9.** The anti-inflammatory effects of CLLV-1 are independent of cAMP levels and PKA in fMLF-activated human neutrophils. (a-b) Human neutrophils were preincubated for 5 min with H<sub>2</sub>O or H89 (3 μM) before the addition of DMSO, CLLV-1 (0.3 μM), or PGE1 (3 μM) and then activated by fMLF (0.1 μM)/CB (1 μg/mL). (a) Superoxide anion generation was detected using cytochrome *c* reduction by spectrophotometry at 550 nm. (b) Elastase release was measured using elastase substrate by spectrophotometry at 405 nm. (c) Human neutrophils were incubated with DMSO or CLLV-1 (0.1 or 1 μM) for 5 min before stimulation with or without fMLF (0.1 μM)/CB (1 μg/mL) for another 1 min. The cAMP levels were measured by enzyme immunoassay kits. All data are expressed as mean values ± SEM (n = 3); \*\*\**p* < 0.001 compared with the H<sub>2</sub>O group (Student's *t*-test).

**Fig. S10.** The chemical interaction of CLLV-1 and synthetic AKT peptides. (a) <sup>1</sup>H NMR spectra of CLLV-1, synthetic AKT peptides (304-308 or 314-318), and mixtures of CLLV-1 and AKT peptides. (b) The synthetic AKT peptides AKT<sub>304-308</sub> or AKT<sub>314-318</sub> were incubated in the presence or absence of CLLV-1. The molecular masses of the synthetic AKT peptides and their CLLV-1 adducts were detected using MALDI-TOF MS. M, molecular mass of AKT peptides.

**Fig. S1**

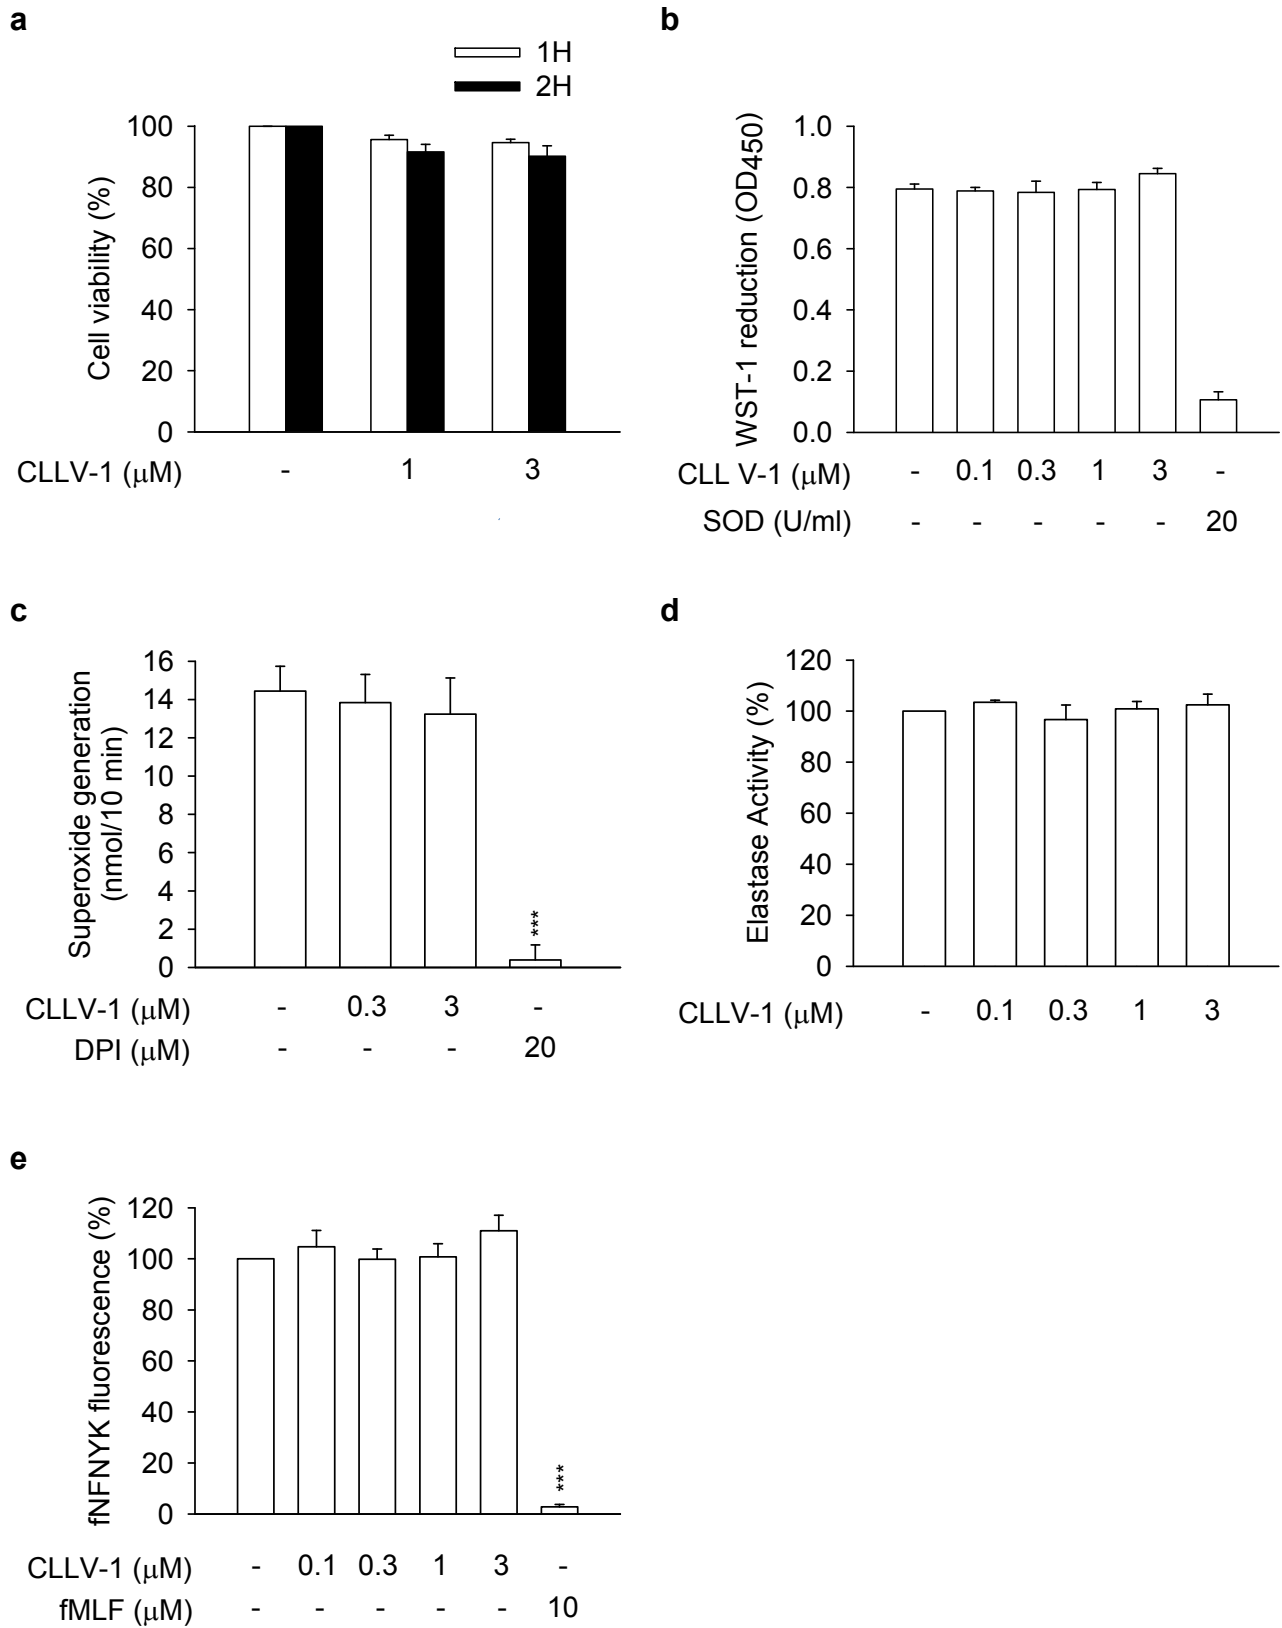

Fig. S2

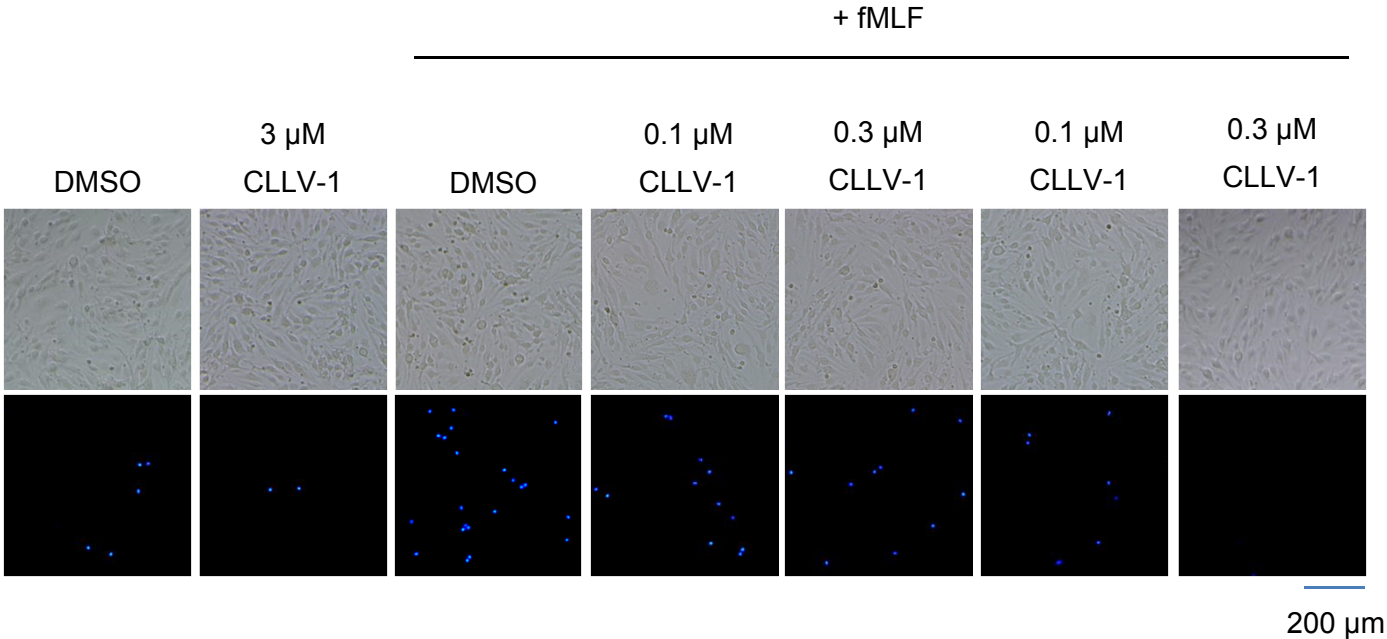

**Fig. S3**

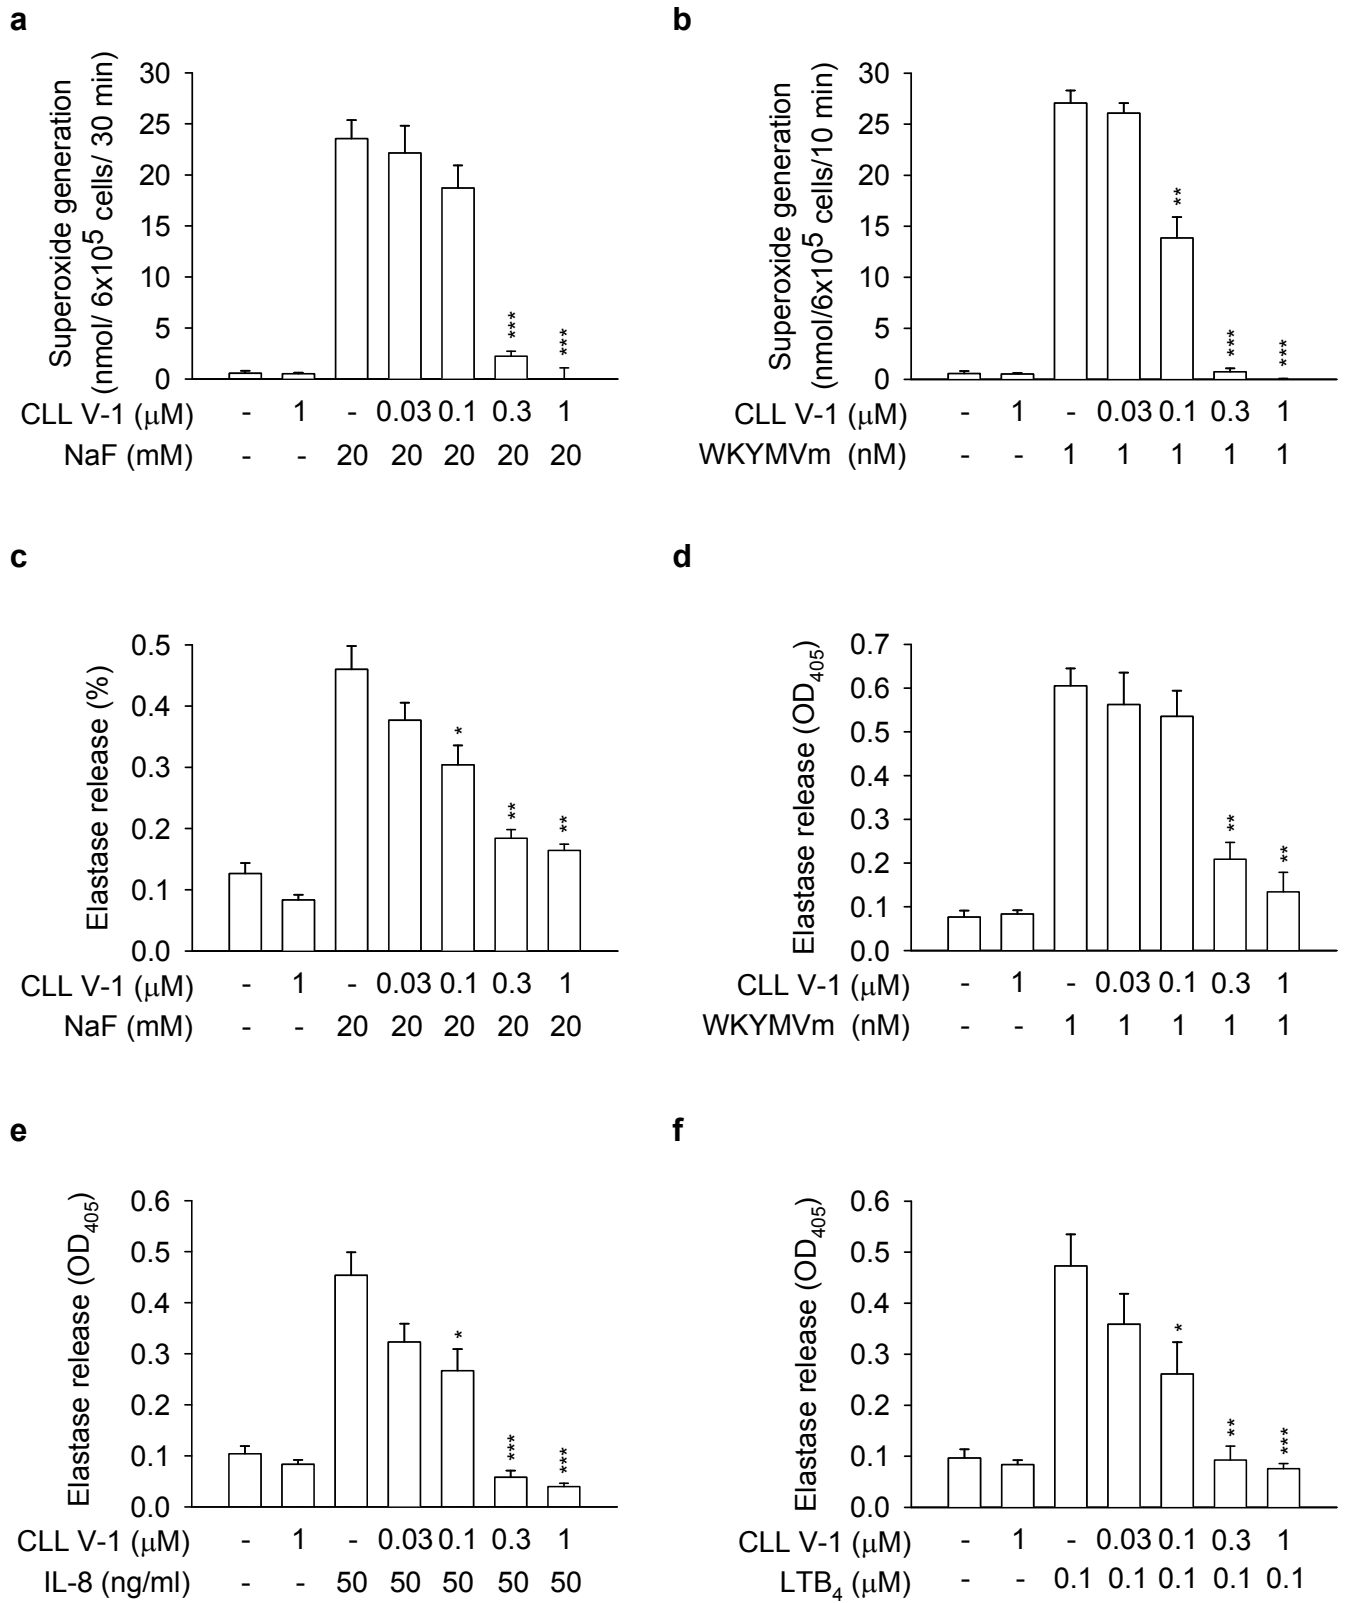

**Fig. S4**

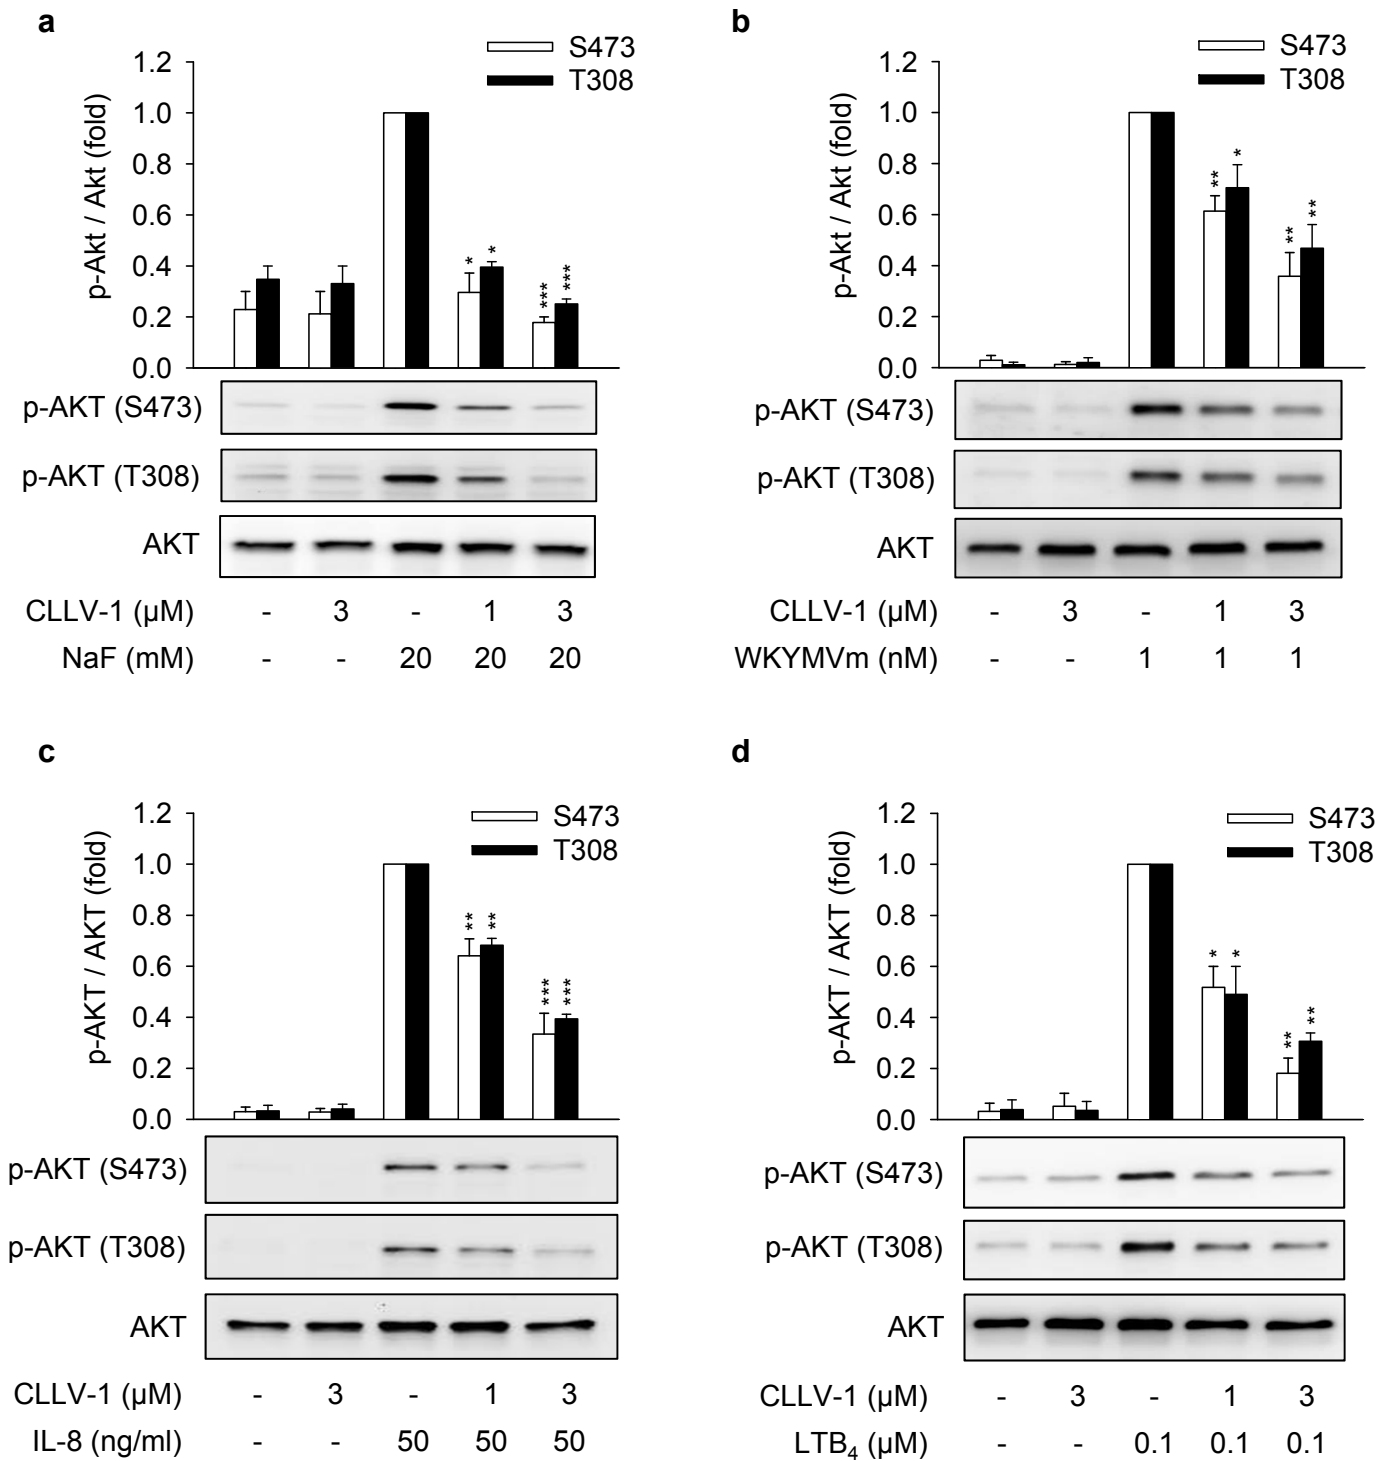

**Fig. S5**

**a**

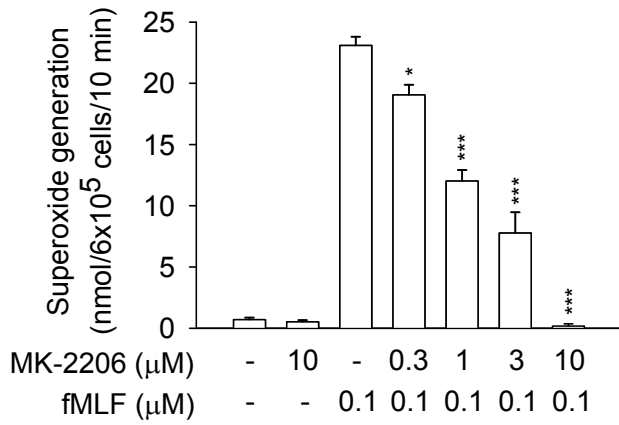

**b**

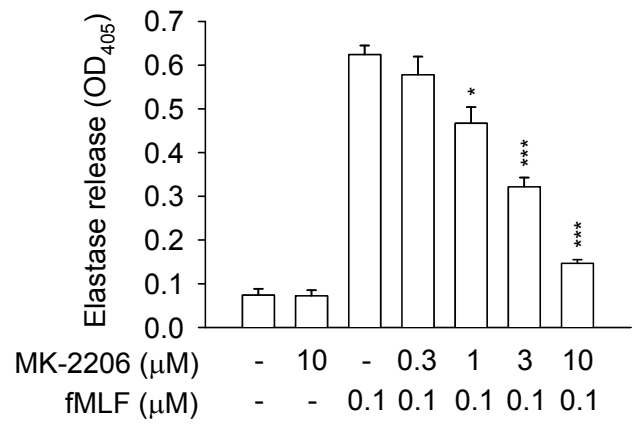

**c**

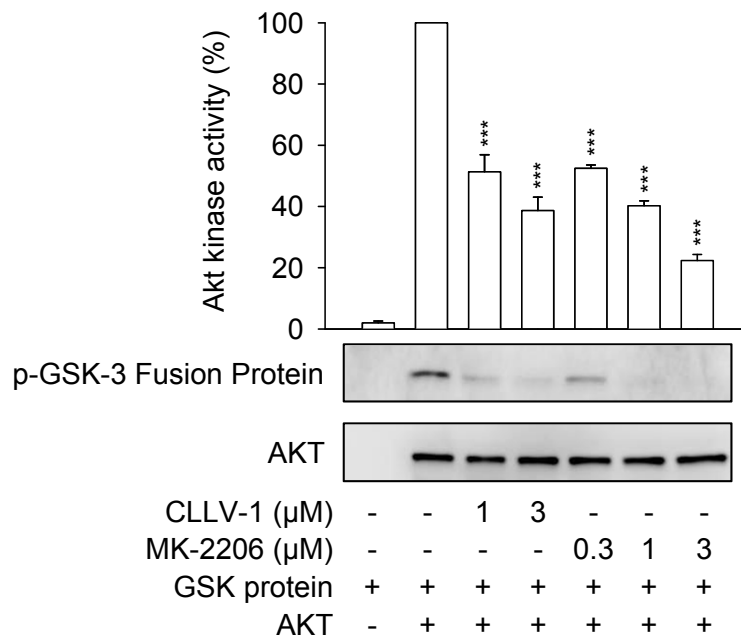

**Fig. S6**

Undifferentiated  
HL-60 cells (D0)

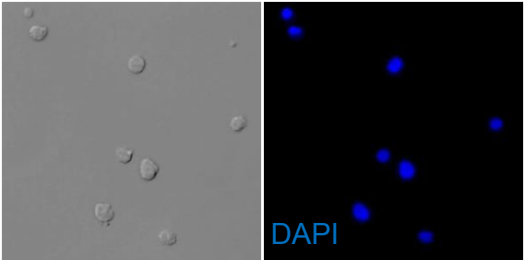

DMSO-differentiated  
dHL-60 cells (D5)

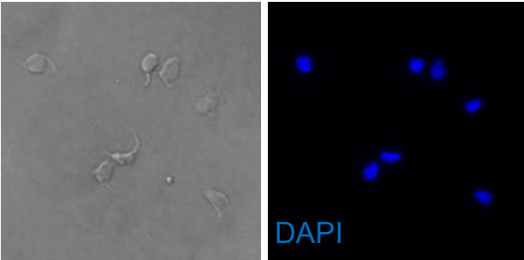



**Fig. S7**

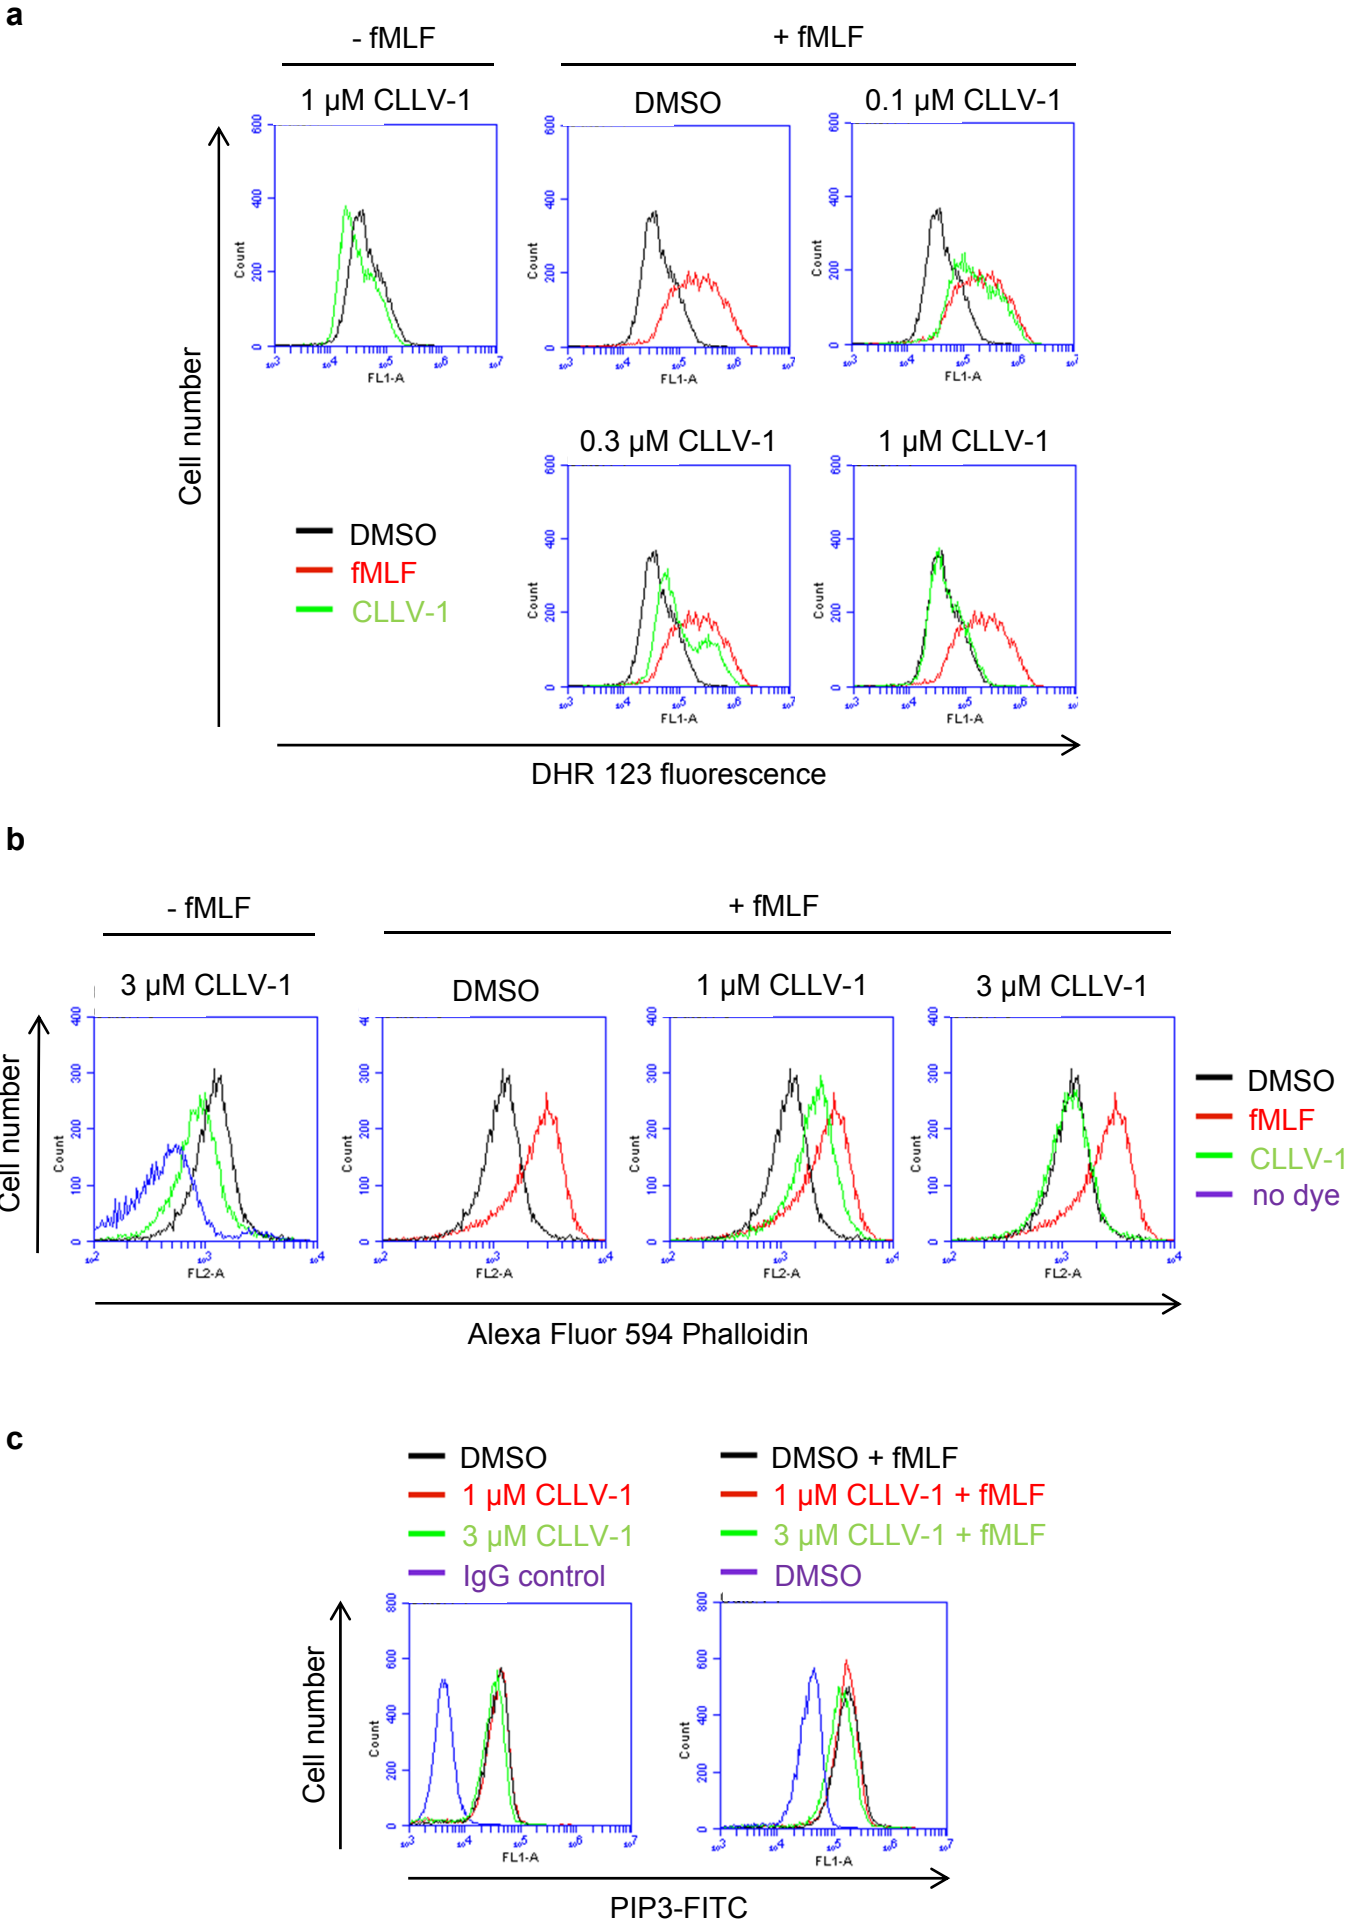

**Fig. S8**

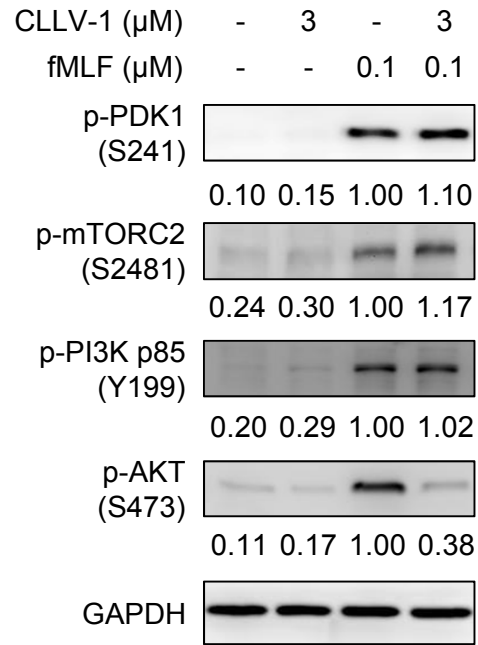

**Fig. S9**

**a**

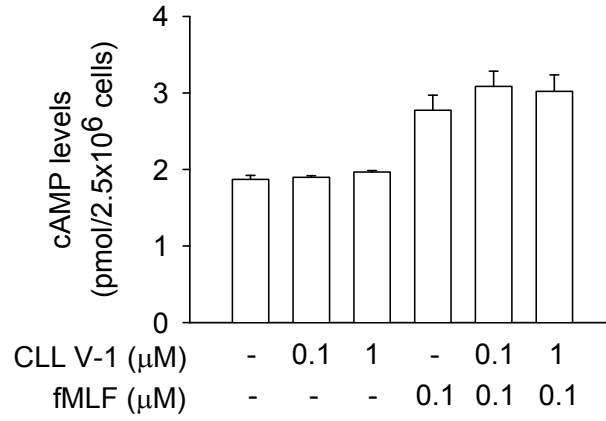

**b**

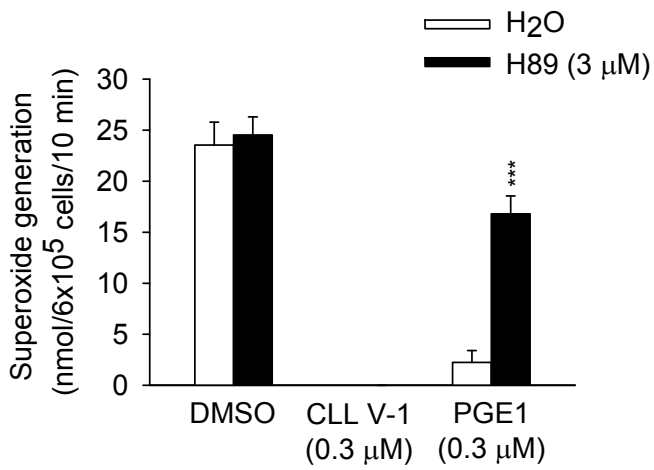

**c**

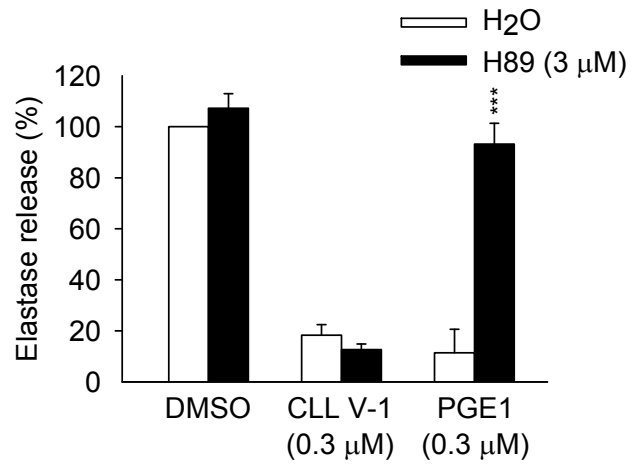

**Fig. S10**

**a**

CLLV-1

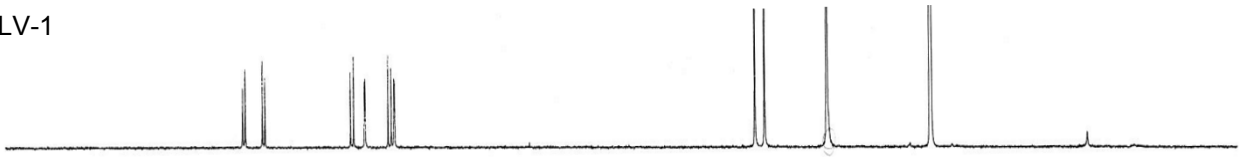

AKT<sub>304-308</sub>

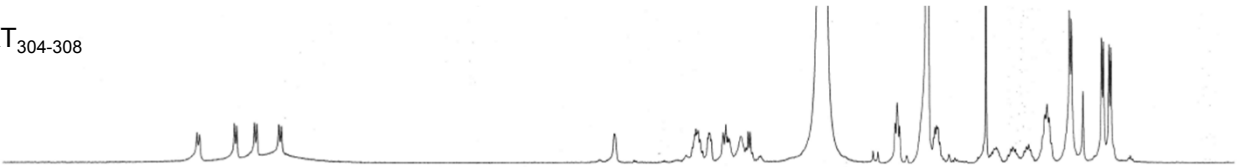

AKT<sub>304-308</sub> + CLLV-1

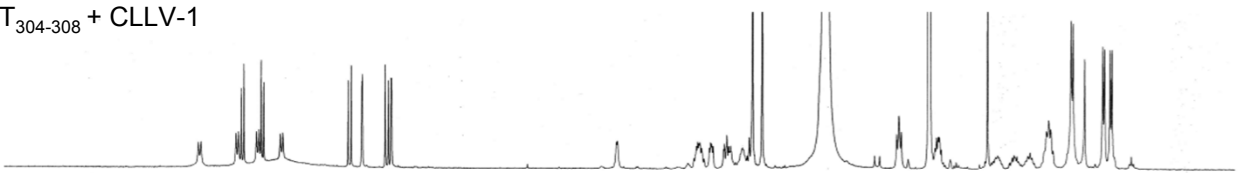

AKT<sub>314-318</sub>

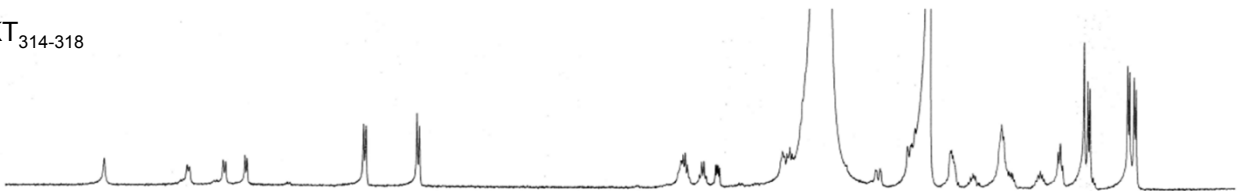

AKT<sub>314-318</sub> + CLLV-1

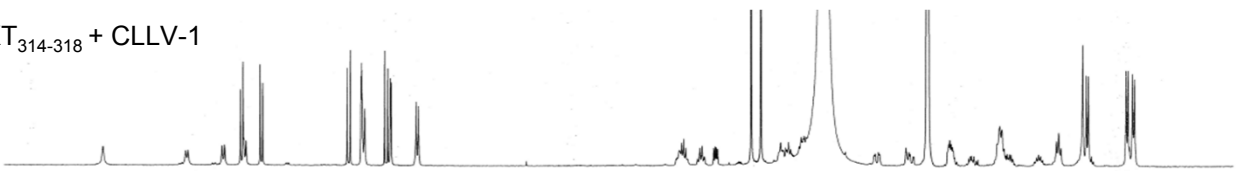

9.5 9.0 8.5 8.0 7.5 7.0 6.5 6.0 5.5 5.0 4.5 4.0 3.5 3.0 2.5 2.0 1.5 1.0 ppm

**b**

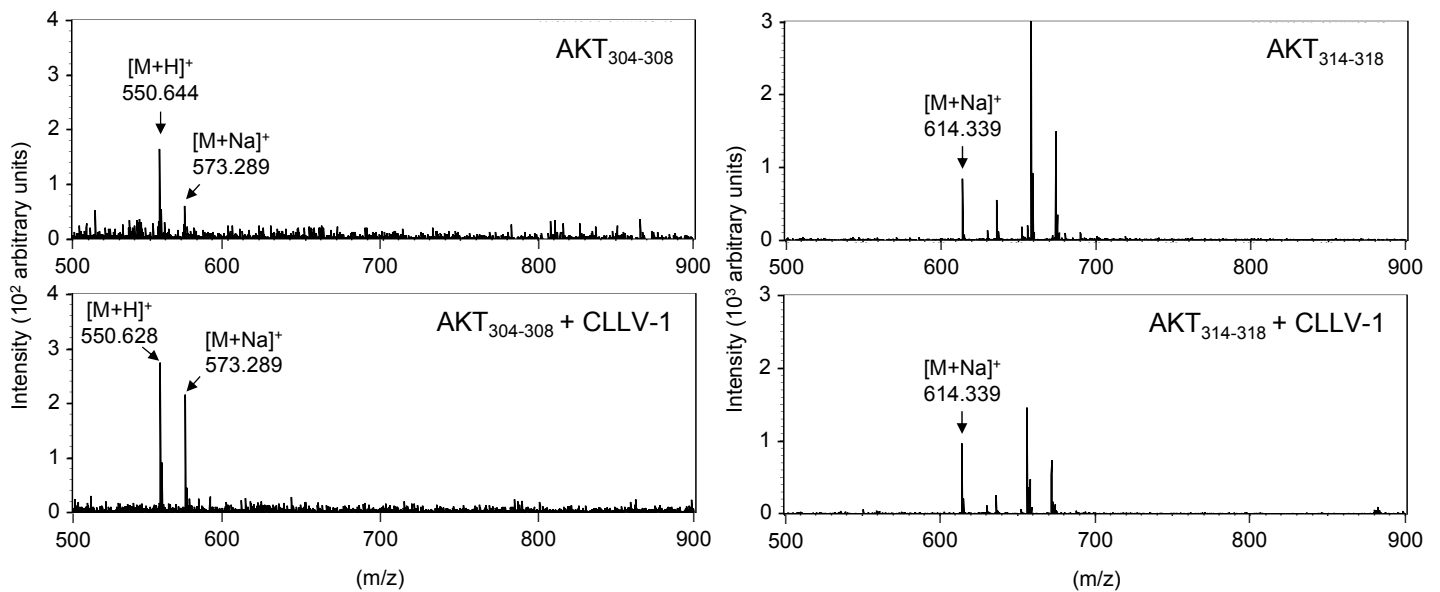

Supplement: mmc1.pdf [file mmc1.pdf]
